# Supplementary material for: The potential consequences of bidirectional promoter methylation on GLA and HNRNPH2 expression in Fabry disease phenotypes in a family of patients carrying a GLA deletion variant
Source: PubMed Central journal article supplement — Biomed Rep. 2022 Jun 24;17(2):71. doi: 10.3892/br.2022.1554 (PMC9326966; doi:10.3892/br.2022.1554), 2022-06-24

Figure S1. Location of the CpG island in the *GLA* and *HNRNPH2* BDP sequence. The CpG island is underlined.

|                   |                   |                   |                   |                   |     |
|-------------------|-------------------|-------------------|-------------------|-------------------|-----|
| CTCAGGGCCG        | TGGTTTTCAA        | ACGTTTTTCG        | CCTTACGGTC        | ACCCTTAGGG        | 50  |
| GTCCCCCGAG        | ACCGGCCCCAG       | ACAGACAGAT        | ATACAAAAAC        | ACATACACAG        | 100 |
| TCATGAGCGT        | CCACCATTTC        | CCCACCAGGC        | GCAGCACAGG        | CGGCTTCCCG        | 150 |
| GCACTGAGAT        | GGGGGGGAGG        | AGGGAGAGAG        | CGCGAGGGGG        | GAGGGGAAAG        | 200 |
| CAGAGAACGA        | AAGAGGCCGA        | GGCGGCCCCC        | GAACCCCGCT        | <u>CTGGTCTTCA</u> | 250 |
| TCATCACCCAC       | CCCTGGGTCC        | CCAGTTCCCA        | CCCACACACC        | <u>AACCTCTAAC</u> | 300 |
| GATACCGGGT        | AATTTTCCTC        | CTTCTTCCCT        | CAAACGGCTA        | <u>TAGCGAGACG</u> | 350 |
| GTAGACGACG        | ACCAGAACTA        | CTTCTGCTCA        | CGTAAGCGAG        | <u>TAATCACGTG</u> | 400 |
| <u>AGCGCCTACG</u> | <u>TCATGTGAGA</u> | <u>TCTCGGTCAC</u> | <u>GTGAGCAACT</u> | <u>CTCGGCTTAA</u> | 450 |
| ACTCGGGATC        | ACTAAGGTGC        | CGCACTTCCT        | TCTGGTATGG        | AAATAGGGCG        | 500 |
| GGTCAATATC        | AAGAAAGGAA        | GAGGGTGATT        | GGTAGCGGA         | ACGTCTTACG        | 550 |
| TGACTGATTA        | TTGGTCTACC        | TCTGGGGATA        | ACCGTCCAG         | TTGCCAGAGA        | 600 |
| AACAATAACG        | TCATTATTTA        | ATAAGTCATC        | GGTATTGGT         | CCGCCCTGA         | 650 |
| GGTTAATCTT        | AAAAGCCCAG        | GTTACCCGCG        | AAAATTTATG        | CTGTCCGGTC        | 700 |
| ACCGTGACAA        | TGCAGCTGAG        | GAACCCAGAA        | CTACATCTGG        | GCTGCGCGCT        | 750 |
| TGCGCTTCGC        | TTCTTGGCCC        | TCGTTTCCTG        | GGACATCCCT        | GGGGCTAGAG        | 800 |
| CACTGGACAA        | TGGATTGGCA        | AGGACGCCCTA       | CCATGGGCTG        | GCTGCACTGG        | 850 |
| GAGCGCTTCA        | TGTGCAACCT        | TGACTGCCAG        | GAAGAGCCAG        | ATTCTTGCAT        | 900 |
| CAGGTATCAG        | ATATTGGGTA        | CTCCCTTCCC        | TTTGCTTTTC        | CATGTGTTTG        | 950 |
| GGTGTGTTTG        | GGGAACGGA         | GAGTCTCAAC        | GGGAACAGTT        |                   |     |

Figure S2. BDP methylation and *GLA* and *HNRNPH2* expression in the normal individuals and FD patients. (A) DNA methylation of the BDP in normal females (C1 and C2) and FD females (FD1 and FD2). (B and C) Expression of *GLA* and *HNRNPH2* in normal females (C1 and C2) and FD females (FD1 and FD 2). (D) DNA methylation of the BDP in normal males (C3 and C4) and FD males (FD3 and FD4). (E and F) Expression of *GLA* and *HNRNPH2* in the normal males (C3 and C4) and FD males (FD3 and FD4). FD, Fabry disease patients; BDP, bidirectional promoter.

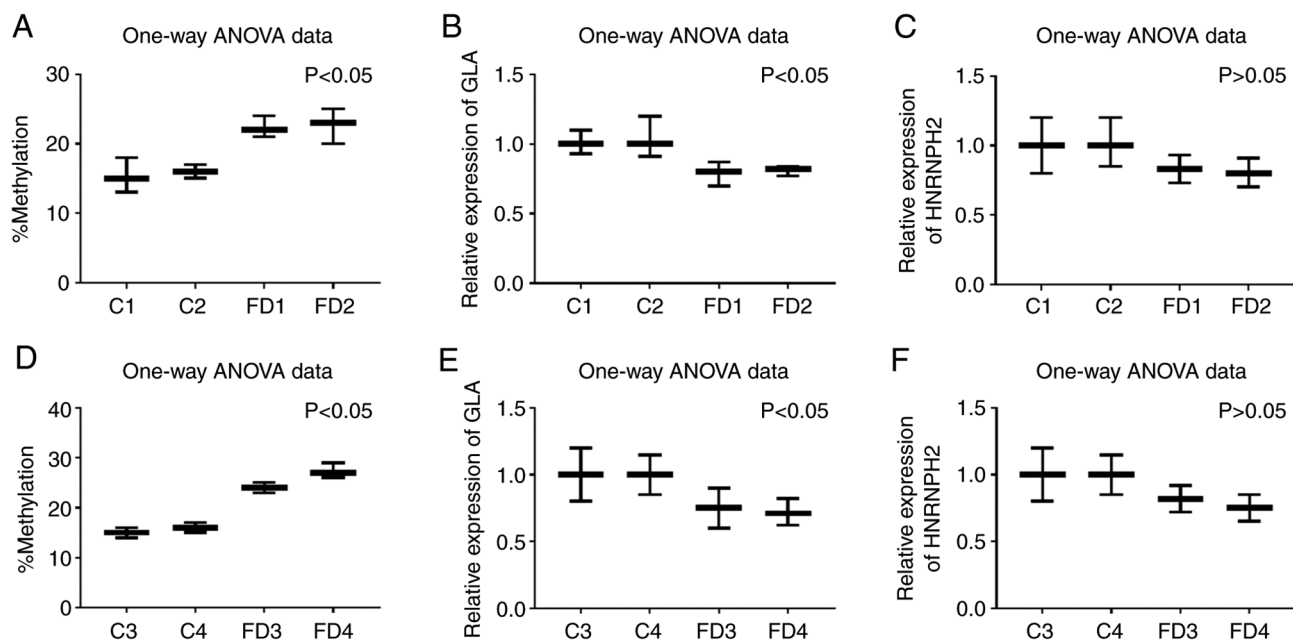

Supplement: Supplementary_Data1.pdf [file Supplementary_Data1.pdf]
