# Supplementary material for: The potential consequences of bidirectional promoter methylation on GLA and HNRNPH2 expression in Fabry disease phenotypes in a family of patients carrying a GLA deletion variant
Source: PubMed Central journal article supplement — Biomed Rep. 2022 Jun 24;17(2):71. doi: 10.3892/br.2022.1554 (PMC9326966; doi:10.3892/br.2022.1554), 2022-06-24
Supplement: Supplementary_Data2.pdf [file Supplementary_Data2.pdf]

Table SI. Genetic conditions associated with variants in human *RPL36A-HNRNPH2* (ENSG00000257529) readthrough, including the *GLA* and rat orthologue gene ENSRNOG00000050463.<sup>a</sup>

| <i>Homo sapiens</i>                                |                  | <i>Rattus norvegicus</i>                             |
|----------------------------------------------------|------------------|------------------------------------------------------|
| Genetic condition/disease                          | ClinVar variants | Genetic condition/disease                            |
| Migalastat response                                | 45               | Sudden death                                         |
| Neurodevelopmental disorder                        | 1                | Syndromic X-linked mental retardation, Bain type     |
| Mental retardation, x-linked, syndromic, Bain type | 5                | Syndromic X-linked intellectual disability Lubs type |
| Cardiovascular phenotype                           | 16               | Autistic disorder                                    |
| Sudden unexplained death                           | 1                | Familial hypertrophic cardiomyopathy                 |
| Hypertrophic cardiomyopathy                        | 8                | Neurodevelopmental disorders                         |
| Familial hypertrophic cardiomyopathy 1             | 2                | Hypertrophic cardiomyopathy                          |
| Primary familial hypertrophic cardiomyopathy       | 6                | Cardiomyopathy                                       |
| Fabry disease, cardiac variant                     | 6                | Fabry disease, Cardiac variant                       |
| Fabry disease                                      | 321              | Fabry disease                                        |
| Cardiomyopathy                                     | 12               | -                                                    |

Data from Ensembl and ClinVar databases.

Table SII. Severity scores of FD patients.

| Patients | MSSI score    |                    |                      |             | FOS-MSSI      |                    |                      |             |
|----------|---------------|--------------------|----------------------|-------------|---------------|--------------------|----------------------|-------------|
|          | General score | Neurological score | Cardiovascular score | Renal score | General score | Neurological score | Cardiovascular score | Renal score |
| FD1      | 1             | 3                  | 10                   | 0           | 1             | 4                  | 12                   | 0           |
| FD2      | 1             | 3                  | 10                   | 0           | 1             | 4                  | 12                   | 0           |
| FD3      | 3             | 8                  | 0                    | 0           | 1             | 8                  | 0                    | 0           |
| FD4      | 5             | 2                  | 12                   | 18          | 5.1           | 1                  | 7                    | 18          |

MSSI, Mainz Severity Score Index; FOS-MSSI, Fabry Outcome Survey adaptation of the Mainz Severity Score Index; FD, Fabry disease.

Table SIII. Summary of *GLA* and *HNRNPH2* expression vs. BPD methylation and severity of FD in the four patients. Severity score is the sum of the FOS-MSSI scores per patient in Table I. Methylation and expression vs. control.

| Patient | Sex | FD Severity | <i>GLA</i> Expression <sup>a</sup> | <i>HNRNPH2</i> Expression <sup>b</sup> | BDP Methylation <sup>a</sup> |
|---------|-----|-------------|------------------------------------|----------------------------------------|------------------------------|
| FD1     | F   | 17          | Decrease                           | Decrease                               | Increase                     |
| FD2     | F   | 17          | Decrease                           | Decrease                               | Increase                     |
| FD3     | M   | 9           | Decrease                           | Decrease                               | Increase                     |
| FD4     | M   | 31.1        | Decrease                           | Decrease                               | Increase                     |

<sup>a</sup>Significant decrease or increase,  $P < 0.05$ . <sup>b</sup>Insignificant decrease,  $P > 0.05$ . BPD, bidirectional promoter; FD, Fabry disease; F, female; M, male.
